# Supplementary material for: Ti3C2 MXene improved photoelectrochemical anode assembly of titanium dioxide nanoarrays for microcystin-LR detection
Source: Royal Society of Chemistry journal article supplement (doi:10.1039/d3an00506b), 2023-01-01
Supplement: d3an00506b1.pdf [file d3an00506b1.pdf]

## Supplementary information

### **Ti<sub>3</sub>C<sub>2</sub> MXene improved photoelectrochemical anode assembly of titanium dioxide nanoarrays for microcystin-LR detection**

Yue Jia<sup>a</sup>, Yu Du<sup>c</sup>, Xiaoyue Zhang<sup>a</sup>, Rui Xu<sup>a</sup>, Xiang Ren<sup>a</sup>, Dan Wu<sup>a</sup>, Hongmin Ma<sup>a</sup>, Qin Wei<sup>a,b,\*</sup>

*<sup>a</sup>Key Laboratory of Interfacial Reaction & Sensing Analysis in Universities of Shandong, School of Chemistry and Chemical Engineering, University of Jinan, Jinan 250022, P. R. China*

*<sup>b</sup>Department of Chemistry, Sungkyunkwan University, Suwon 16419, Republic of Korea.*

*<sup>c</sup>Collaborative Innovation Center for Green Chemical Manufacturing and Accurate Detection, University of Jinan, Jinan 250022, P. R. China.*

---

**\*Corresponding Author**

E-mail: sdjndxwq@163.com (Qin Wei)

## Table of Contents

|                                                                                        |   |
|----------------------------------------------------------------------------------------|---|
| UV-VIS-NIR absorption of $\text{TiO}_2$ and $\text{TiO}_2/\text{Ti}_3\text{C}_2$ ..... | 3 |
| EDS line scan of $\text{TiO}_2/\text{Ti}_3\text{C}_2$ .....                            | 4 |
| Band gap and valence band spectra of rutile $\text{TiO}_2$ .....                       | 5 |
| Simulation parameters of the equivalent circuit components.....                        | 6 |
| Specificity tests of sensors.....                                                      | 7 |

## UV-VIS-NIR absorption of $\text{TiO}_2$ and $\text{TiO}_2/\text{Ti}_3\text{C}_2$

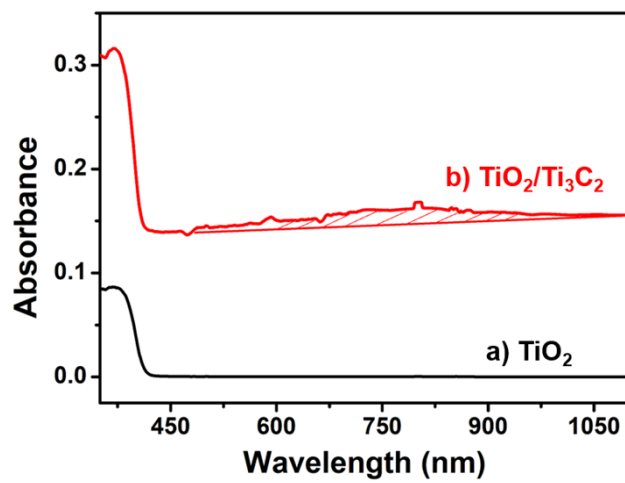

**Fig. S1.** UV-VIS-NIR absorption of  $\text{TiO}_2$  and  $\text{TiO}_2/\text{Ti}_3\text{C}_2$ .

## EDS line scan of $\text{TiO}_2/\text{Ti}_3\text{C}_2$

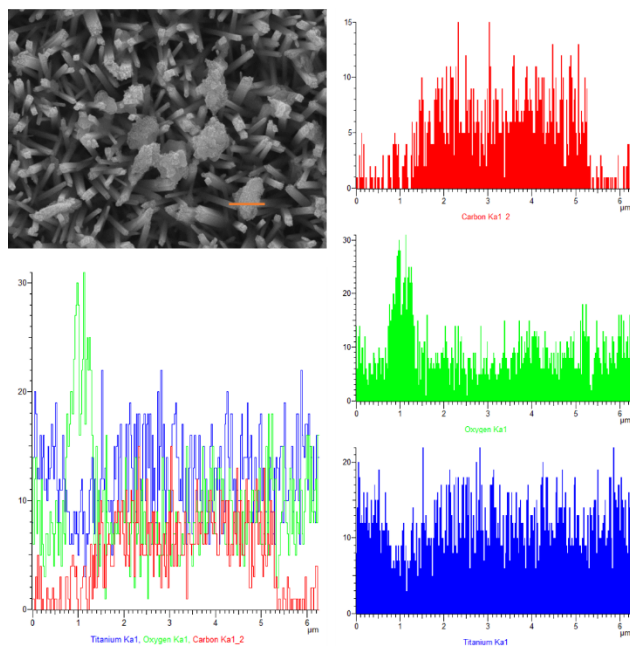

**Fig. S2.** EDS line scan of  $\text{TiO}_2/\text{Ti}_3\text{C}_2$ .

## Band gap and valence band spectra of rutile $\text{TiO}_2$

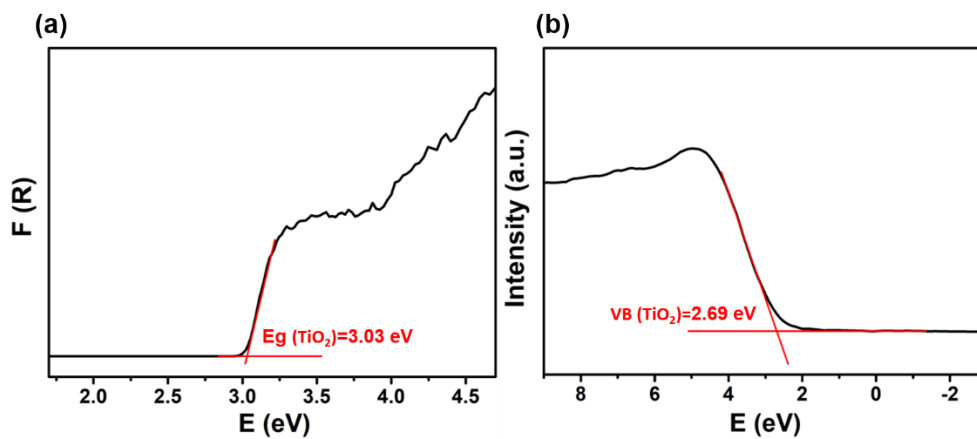

**Fig. S3.** (a) Band gap and (b) valence band spectra of rutile  $\text{TiO}_2$ .

## Simulation parameters of the equivalent circuit components

**Table S1** Simulation parameters of the equivalent circuit components

| Electrode modification                                              | $R_s$ (ohm) | $R_{et}$ (ohm) | $C_{dl}$ (F)           | $Z_w$     |
|---------------------------------------------------------------------|-------------|----------------|------------------------|-----------|
| FTO                                                                 | 188.1       | 1740           | $2.608 \times 10^{-5}$ | 0.0009907 |
| FTO/TiO <sub>2</sub>                                                | 74.15       | 2992           | $1.03 \times 10^{-5}$  | 0.008969  |
| FTO/TiO <sub>2</sub> /Ti <sub>3</sub> C <sub>2</sub>                | 55.23       | 1695           | $1.573 \times 10^{-5}$ | 0.00785   |
| FTO/TiO <sub>2</sub> /Ti <sub>3</sub> C <sub>2</sub> /aptamer       | 43.39       | 1983           | $1.46 \times 10^{-5}$  | 0.005299  |
| FTO/TiO <sub>2</sub> /Ti <sub>3</sub> C <sub>2</sub> /aptamer/MC-LR | 55.72       | 2832           | $1.129 \times 10^{-5}$ | 0.009516  |

### Specificity tests of sensors.

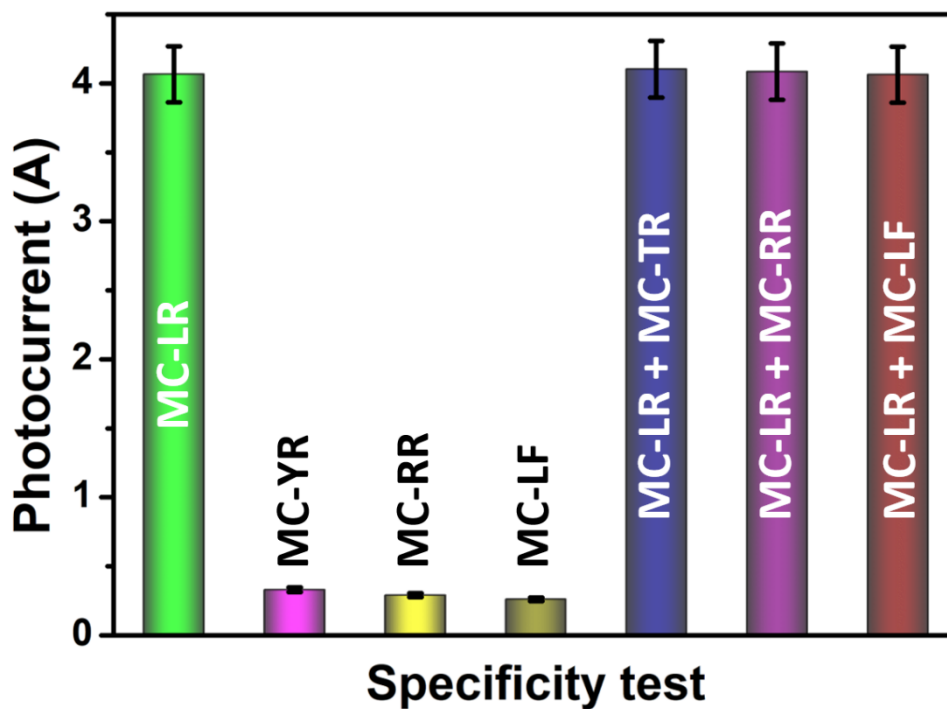

**Fig. S4.** The specificity tests of sensors using 0.1 ng/mL of MC-YR, MC-RR and MC-LF as targets mixed with 0.1 ng/mL of MC-LR.
